# Supplementary material for: Unravelling young COPD and pre-COPD in the general population
Source: PubMed Central journal article supplement — ERJ Open Res. 2023 Feb 20;9(1):00334-2022. doi: 10.1183/23120541.00334-2022 (PMC9940715; doi:10.1183/23120541.00334-2022), 2023-02-20
Supplement: 00334-2022.SUPPLEMENT.pdf [file 00334-2022.SUPPLEMENT.pdf]

APPENDIX

**Principal Investigators, collaborators, and participating centres:**

| <b>Autonomous Community</b> | <b>CENTRE</b>                   | <b>INVESTIGATOR TEAM</b>                                                                                                                        |
|-----------------------------|---------------------------------|-------------------------------------------------------------------------------------------------------------------------------------------------|
| MADRID                      | H. La Princesa                  | Julio Ancochea Bermudez (IP) / Elena García Castillo / Claudia Valenzuela / Joan B Soriano                                                      |
| CASTILLA LEÓN               | H. U. de Burgos                 | Ana Pueyo Bastida (IP) / Lourdes Lázaro Asegurado / Luis Rodríguez Pascual / M <sup>a</sup> José Mora                                           |
| ARAGÓN                      | H. Gral. San Jorge              | Luis Borderias Clau (IP) / Lourdes Arizón Mendoza / Sandra García                                                                               |
| EXTREMADURA                 | H. San Pedro de Alcántara       | Juan Antonio Riesco Miranda (IP) / Julián Grande Gutiérrez / Jesús Agustín Manzano / Manuel Agustín Sojo González                               |
| CASTILLA LEÓN               | H. Clínico U. de Salamanca      | Miguel Barrueco Ferrero (IP) / Milagros Rosales                                                                                                 |
| GALICIA                     | H. Álvaro Cunqueiro             | José Alberto Fernández Villar (IP) / Cristina Represas / Ana Priegue / Isabel Portela Ferreño / Cecilia Mouronte Roibás / Sara Fernández García |
| I. BALEARES                 | H. Son Espases                  | Borja G Cosío (IP) / Rocío Cordova Díaz / Nuria Toledo Pons / Margalida Llabrés                                                                 |
| ARAGÓN                      | H. U. Miguel Servet             | José María Marín Trigo (IP) / Marta Forner / Begoña Gallego / Pablo Cubero / Elisabet Vera                                                      |
| C. VALENCIANA               | H. Arnau de Vilanova (Valencia) | Juan José Soler Cataluña (IP) / M <sup>a</sup> Begoña Picurelli Albero / Noelia González García                                                 |
| ANDALUCÍA                   | H. Virgen de la Macarena        | Agustín Valido Morales (IP) / Carolina Panadero / Cristina Benito Bernáldez/ Laura Martín -Bejarano y Maria Velarde                             |

|                    |                                                                           |                                                                                                                                                                                                                                                                                  |
|--------------------|---------------------------------------------------------------------------|----------------------------------------------------------------------------------------------------------------------------------------------------------------------------------------------------------------------------------------------------------------------------------|
| MURCIA             | H. Gral. U. Santa Lucía (Cartagena)                                       | Antonio Santa Cruz Siminiani (IP) / Carlos Castillo Quintanilla / Rocío Ibáñez Meléndez / José Javier Martínez Garcerán / Desirée Lozano Vicente / Pedro García Torres / Maria del Mar Valdivia                                                                                  |
| NAVARRA            | Clínica Universidad de Navarra                                            | Juan Pablo de Torres Tajés (IP) / Montserrat Cizur Girones / Carmen Labiano Turrillas                                                                                                                                                                                            |
| LA RIOJA           | H. de San Pedro (Logroño)                                                 | Carlos Ruiz Martínez (IP)/ Elena Hernando / Elvira Alfaro / José Manuel García / Jorge Lázaro                                                                                                                                                                                    |
| PAÍS VASCO         | H. Santiago Apóstol (H. Txagorritxu)                                      | David Bravo (IP) /Laura Hidalgo / Silvia Francisco Terreros / Iñaki Zorrilla / Ainara Alonso Colmenero /                                                                                                                                                                         |
| ASTURIAS           | H. Central de Asturias                                                    | Cristina Martínez González (IP) /Susana Margon/ Rosirys Guzman Taveras/ Ramón Fernández / Alicia Álvarez                                                                                                                                                                         |
| CANTABRIA          | H. de Valdecilla (Servicio de Neumología en el H. Santa Cruz de Liencres) | José Ramón Agüero Balbín (IP) / Juan Agüero Calvo                                                                                                                                                                                                                                |
| CATALUÑA           | H. U. Vall d'Hebron                                                       | Jaume Ferrer Sancho (IP) / Esther Rodríguez González/ Eduardo Loeb                                                                                                                                                                                                               |
| CASTILLA LA MANCHA | H. U. de Guadalajara                                                      | José Luis Izquierdo Alonso (IP) / M <sup>a</sup> Antonia Rodríguez García                                                                                                                                                                                                        |
| I. CANARIAS        | H. U. de Tenerife                                                         | Juan Abreu González (IP)/ Candelaria Martín García/ Rebeca Muñoz/ Haydée Martín García                                                                                                                                                                                           |
| ASTURIAS           | H. U. de San Agustín (Avilés):                                            | Miguel Angel Martínez Muñiz (IP) / Andrés Avelino Sánchez Antuña / Jesús Allende González / Jose Antonio Gullón Blanco / Fernando José Alvarez Navascues / Manuel Angel Villanueva Montes / María Rodríguez Pericacho / Concepción Rodríguez García / Juan Diego Alvarez Mavárez |
